# Supplementary material for: Cruzipain and Its Physiological Inhibitor, Chagasin, as a DNA-Based Therapeutic Vaccine Against Trypanosoma cruzi
Source: PubMed Central journal article supplement (PMC7583359; doi:10.3389/fimmu.2020.565142), 2020-10-09

\_ Non infected Controls \_

A

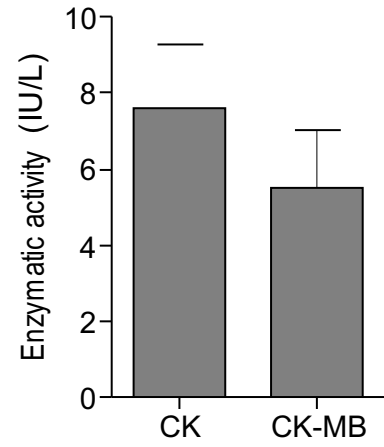

B

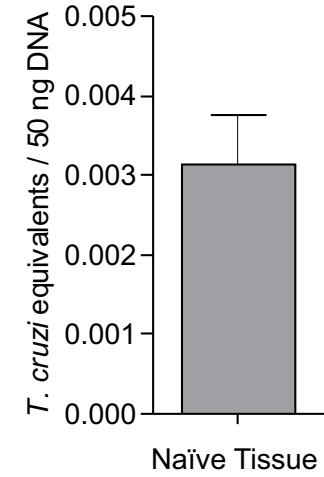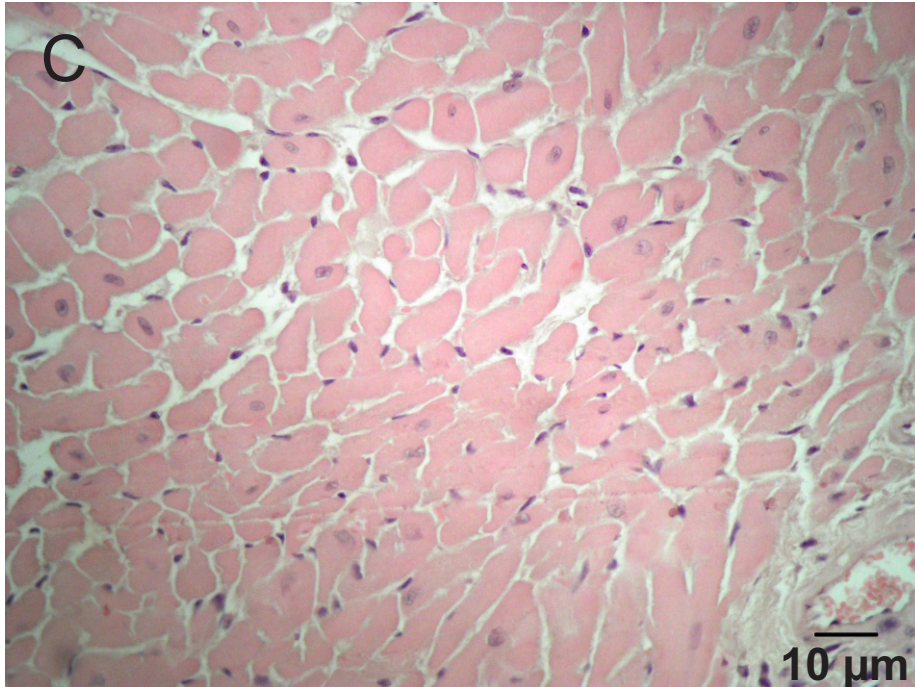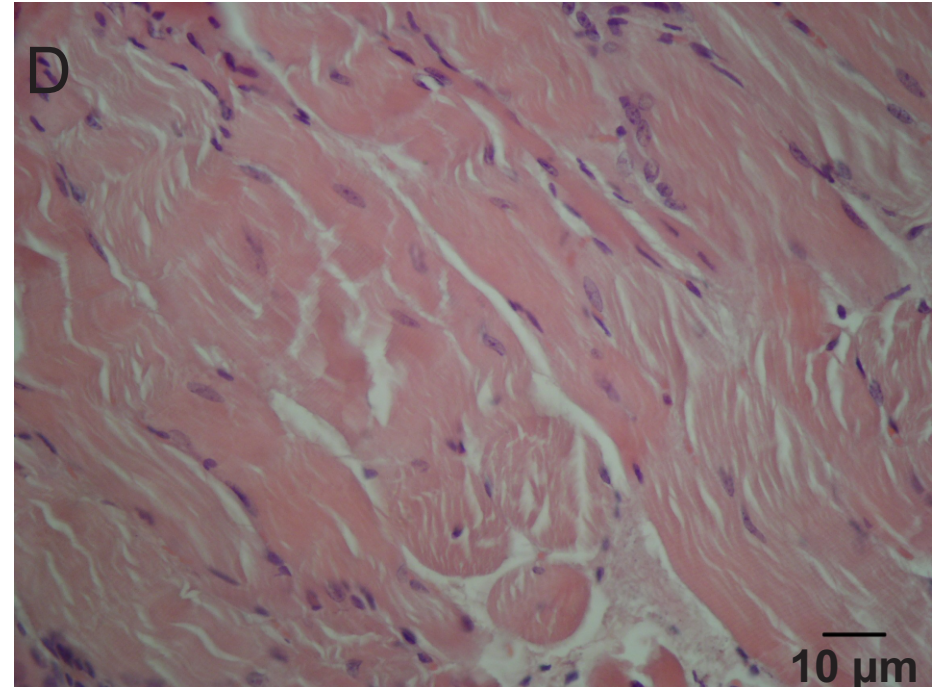

Supplement: Image_1.pdf [file Image_1.pdf]
